# Supplementary material
Source: Copernicus journal article supplement (doi:10.5194/acp-26-6507-2026)
Supplement: Supplementary file 1 [file acp-26-6507-2026-supplement.pdf]

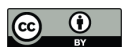

*Supplement of*

## **Machine-learning-based identification of influencing factors and synoptic patterns of foehn on the eastern foothills of the Taihang Mountains, China**

**Xinpeng Xu et al.**

*Correspondence to:* Shoujuan Shu ([sjshu@zju.edu.cn](mailto:sjshu@zju.edu.cn))

The copyright of individual parts of the supplement might differ from the article licence.

Supplement

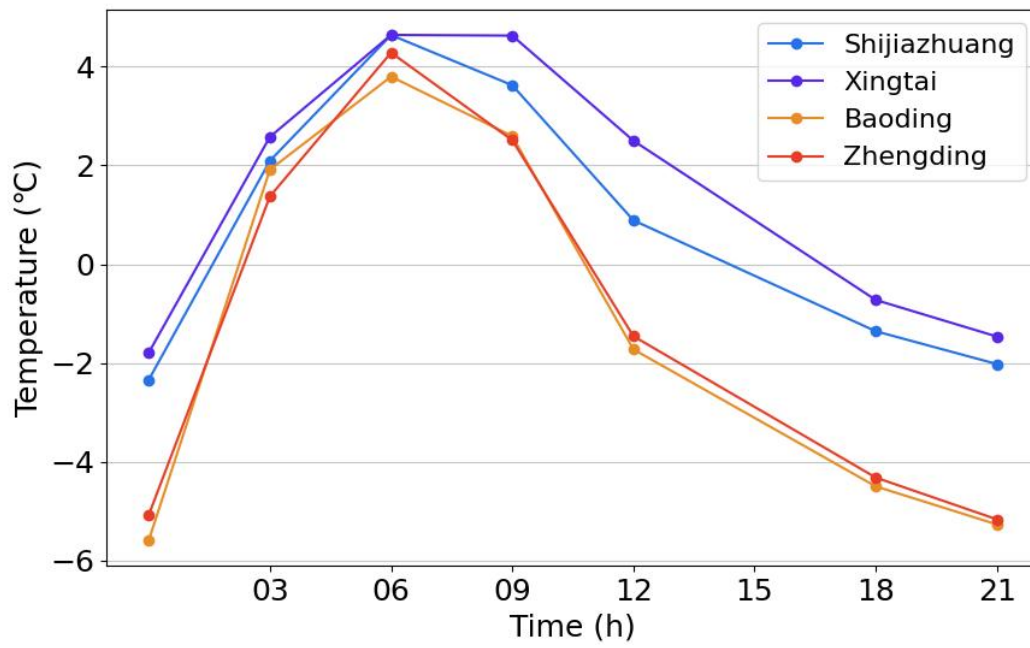

Figure S1: Winter daily-hour average comparison of 2m temperature among the leeward stations.

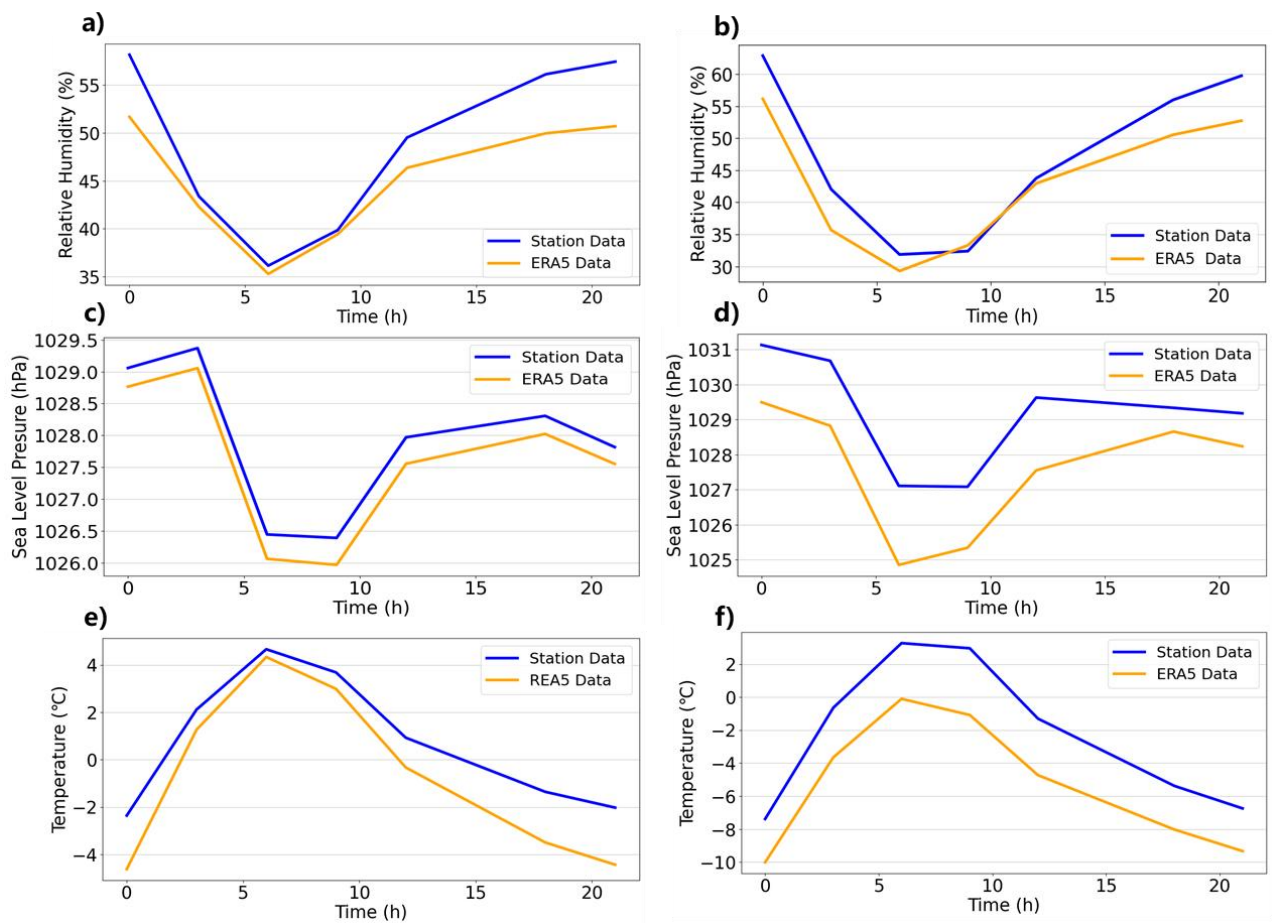

**Figure S2: Winter daily-hour average comparison of station data and ERA5 data. (a-b) Ground relative humidity. (c-d) Sea level pressure. (e-f) 2m temperature. The left column shows data for Shijiazhuang, and the right is for Taiyuan.**

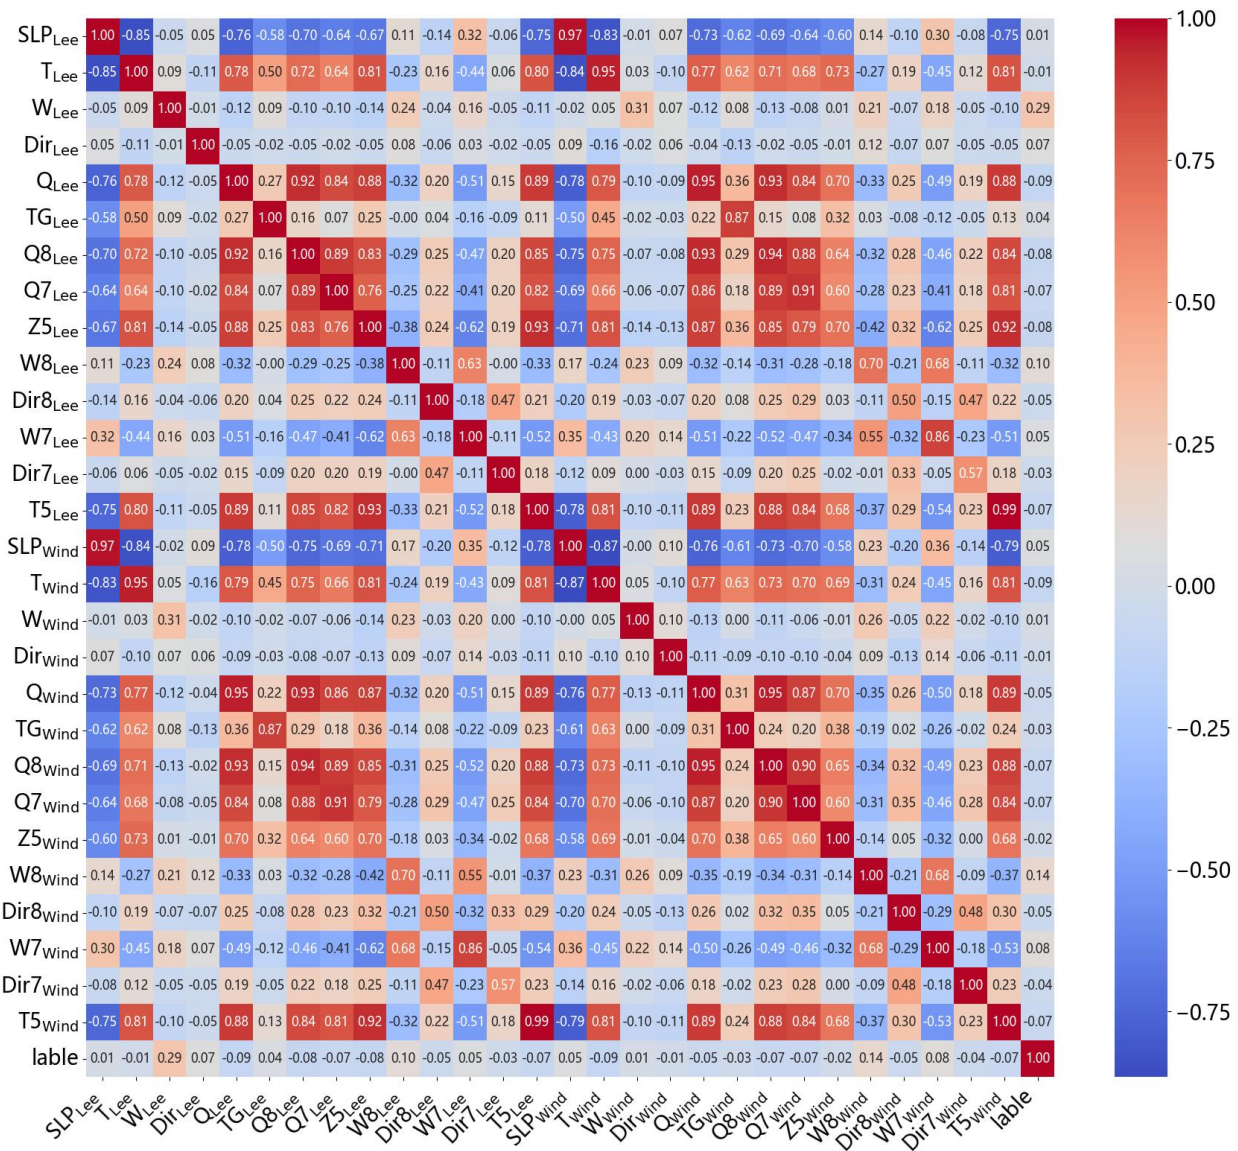

Figure S3: The Pearson correlation coefficient matrix of each factor.

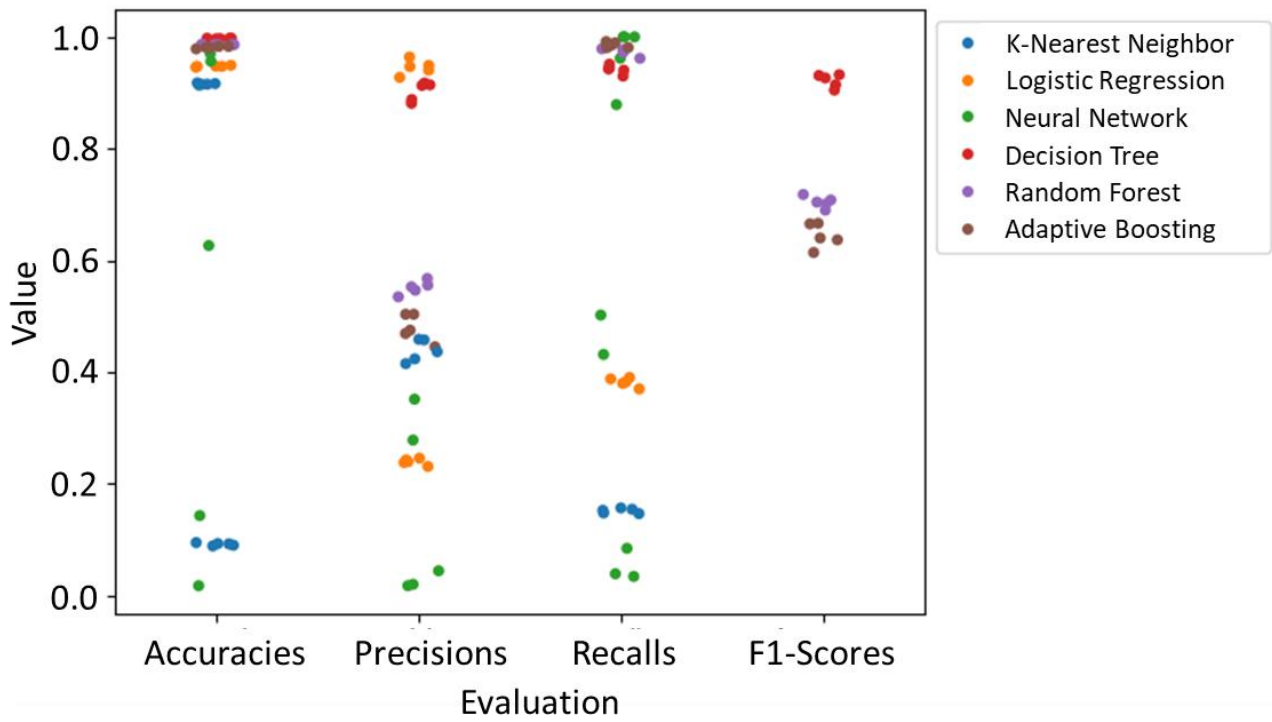

Figure S4: Scatter plots of each model's evaluation indicators. Each dot represents the result of one training session in k-fold cross-validation, and different colors represent different models.

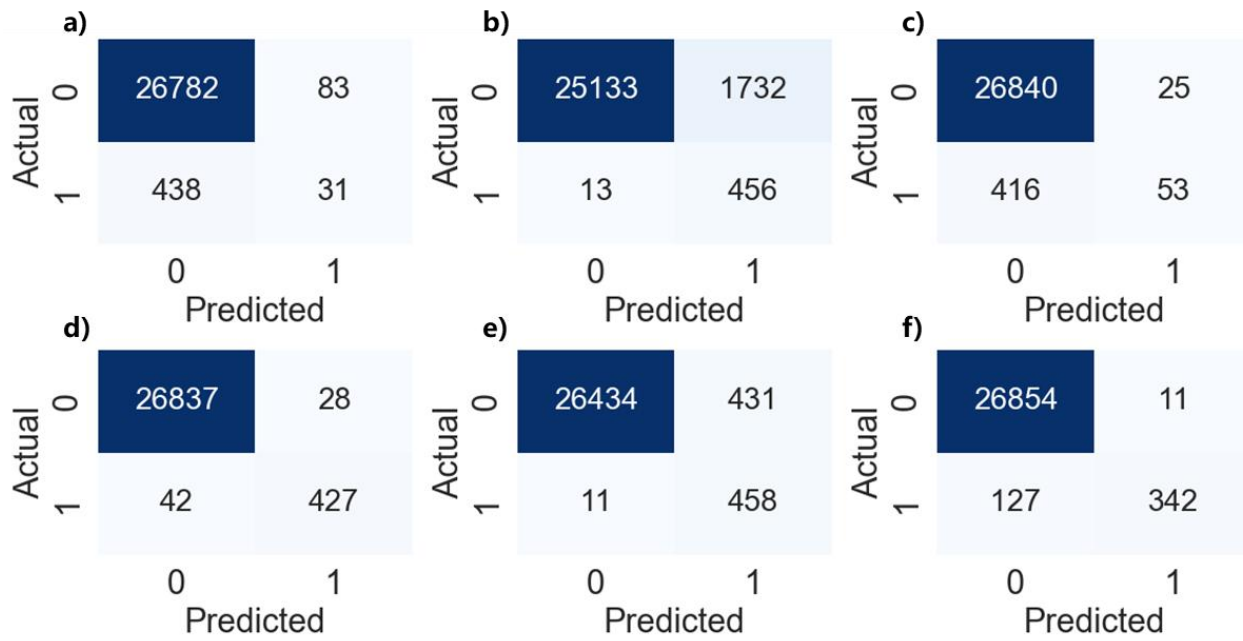

Figure S5: The confusion matrices of each model. (a-f) are K-Nearest Neighbor, Logistic Regression, Neural Network, Decision Tree, Random Forest and Adaptive Boosting respectively.

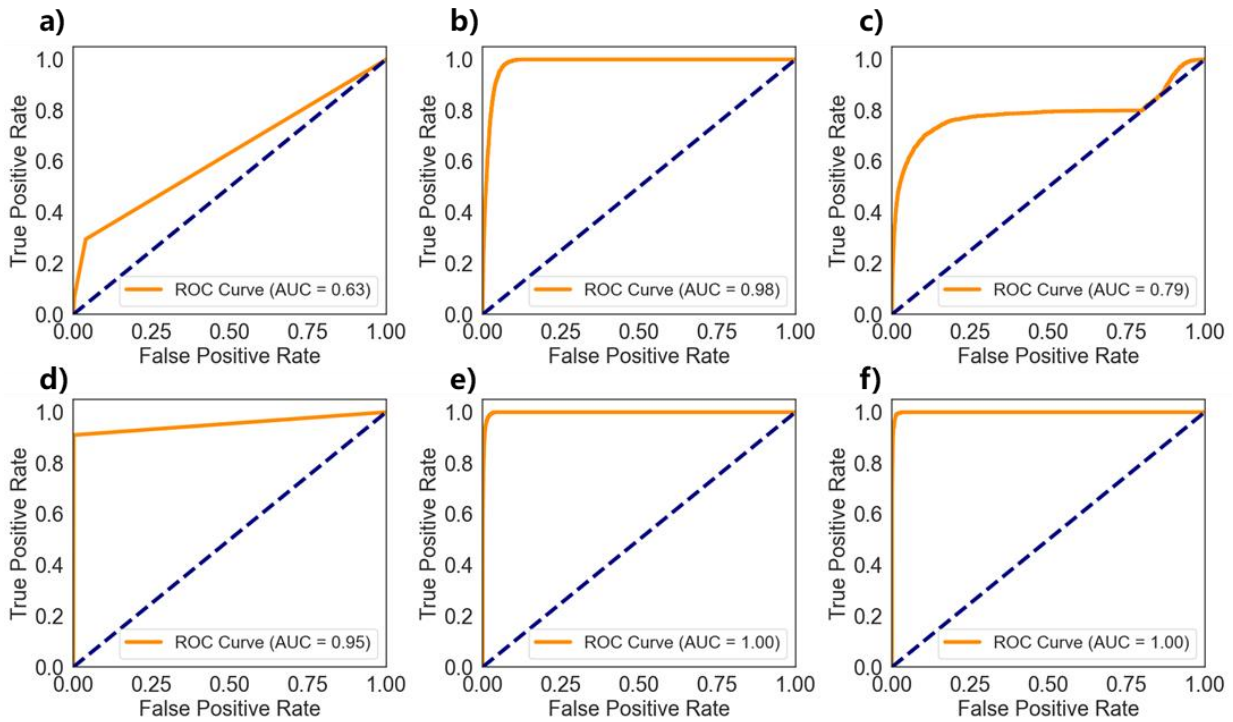

**Figure S6: The ROC curves and AUC of each model. (a-f) are K-Nearest Neighbor, Logistic Regression, Neural Network, Decision Tree, Random Forest and Adaptive Boosting respectively.**

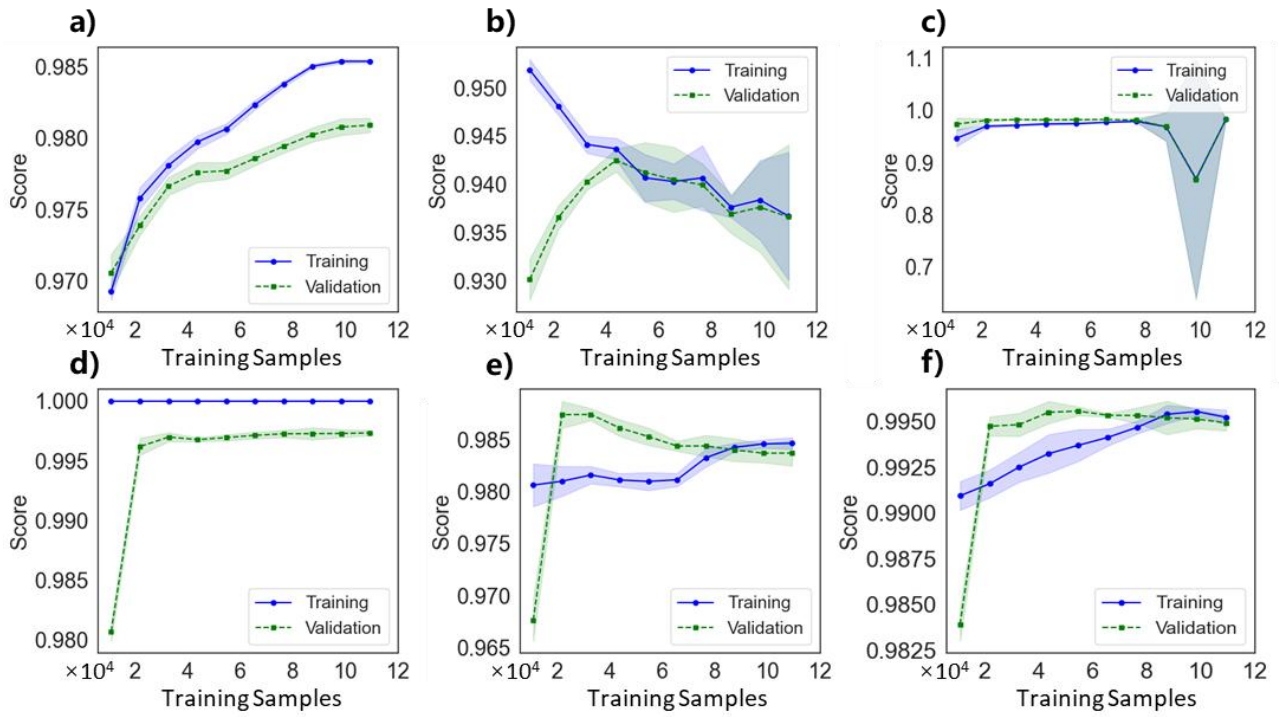

**Figure S7: The learning curves of each model. (a-f) are K-Nearest Neighbor, Logistic Regression, Neural Network, Decision Tree, Random Forest and Adaptive Boosting respectively**

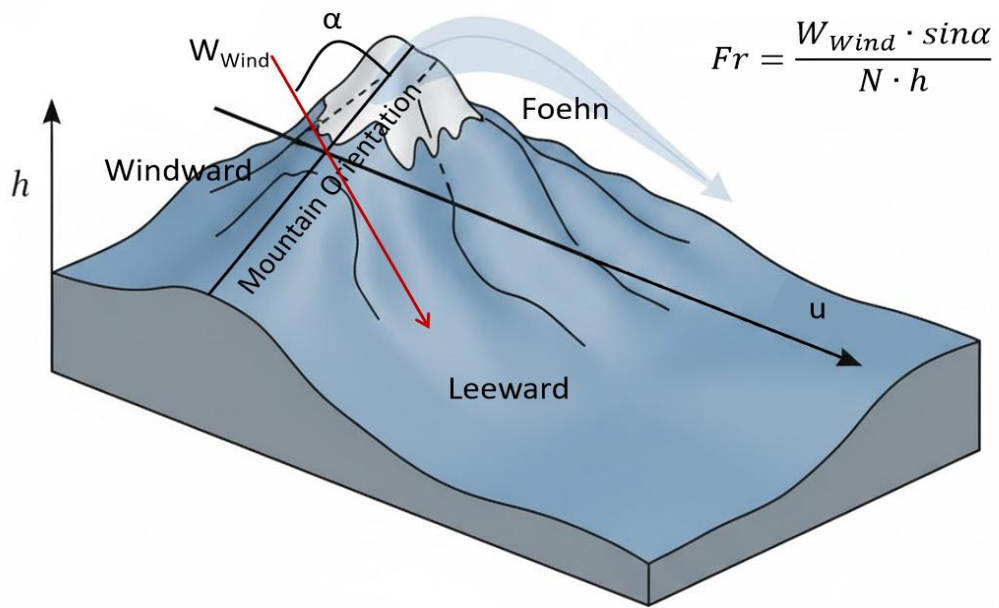

Figure S8: Schematic diagram illustrating the Froude number in relation to wind direction when the influence of small-scale terrain on wind direction is neglected.  $Fr$  is the Froude number;  $u$  is the velocity of the flow normal to the topographic barrier;  $N$  is the Brunt Väisälä frequency;  $h$  is the height of the topographic barrier; and  $\alpha$  is the angle between  $W_{Wind}$  and the mountain orientation.

**Table S1: The threshold values and contributions of factors during the occurrence of foehn on the eastern foothills of the Taihang Mountains.**

| Factors     | All year                                             | Winter    | Summer    | Contribution                                                                                                                      |
|-------------|------------------------------------------------------|-----------|-----------|-----------------------------------------------------------------------------------------------------------------------------------|
| $W_{Lee}$   |                                                      | >3 m/s    |           | Winter>Summer                                                                                                                     |
| $T_{Wind}$  | <3°C                                                 | <-6°C     | <9°C      | Winter<Summer                                                                                                                     |
| $T_{Lee}$   | \                                                    | \         | \         | Mainly based on the windward station.                                                                                             |
| $Q_{Wind}$  | >0.1g/kg                                             | >0.07g/kg | >0.75g/kg | (It mainly has an inhibitory effect, and the inhibitory effect is not significant after reaching the threshold.)<br>Winter>Summer |
| $Q_{Lee}$   | \                                                    | \         | \         | Mainly based on the windward station.                                                                                             |
| $Dir_{Lee}$ | 203° -324° (41%), where 237° -294° contributes most. |           |           | \                                                                                                                                 |
